# Supplementary material for: Adenosine A2A and A3 Receptors as Targets for the Treatment of Hypertensive-Diabetic Nephropathy
Source: PubMed Central journal article supplement (PMC7700226; doi:10.3390/biomedicines8110529), 2020-11-23
Supplement: biomedicines-08-00529-s001.pdf [file biomedicines-08-00529-s001.pdf]

**Table S1.** Metabolic and renal function parameters of SHR-STZ rats treated with CADO or DPSPX.

|               | P-glucose<br>mg/dL | BW<br>g | Food intake<br>g/24h | Water intake<br>mL/24h | U-excretion<br>mL/24h | U-glucose<br>g/kg/24h | U-proteins<br>mg/kg/24h | GFR<br>mL/min | FE <sub>Na</sub><br>% | SBP<br>mmHg |
|---------------|--------------------|---------|----------------------|------------------------|-----------------------|-----------------------|-------------------------|---------------|-----------------------|-------------|
| SHR-STZ       | 382 ± 44           | 177 ± 9 | 25.3 ± 1.3           | 126 ± 9                | 106 ± 10              | 23.4 ± 2.4            | 198 ± 24                | 2.0 ± 0.3     | 0.8 ± 0.1             | 143 ± 8     |
| SHR-STZ+CADO  | 232 ± 51*          | 196 ± 7 | 24.7 ± 1.0           | 115 ± 6                | 96 ± 5                | 13.2 ± 0.9*           | 84 ± 13*                | 1.6 ± 0.1     | 0.7 ± 0.1             | 114 ± 4*    |
| SHR-STZ+DPSPX | 271 ± 63           | 174 ± 6 | 24.3 ± 1.8           | 109 ± 10               | 90 ± 10               | 22.1 ± 2.1            | 142 ± 15                | 1.7 ± 0.2     | 0.5 ± 0.1*            | 137 ± 8     |

Abbreviations: P-plasma; BW-body weight; U-urine; GFR-glomerular filtration rate; FE<sub>Na</sub> - fractional excretion of Na<sup>+</sup>; SBP – Systolic blood pressure. Results expressed as mean ± S.E.M.. \*  $p < 0.05$  vs SHR-STZ. Data concerned with SHR-STZ and SHR-STZ+CADO groups has been partially published elsewhere[20].

**Table S2.** Production of hydrogen peroxide (H<sub>2</sub>O<sub>2</sub>) and activity of H<sub>2</sub>O<sub>2</sub>-neutralizing enzymes in the kidney tissue and urinary markers of oxidative stress of SHR-STZ rats treated with CADO or DPSPX.

|                  | Renal Medulla                                            |                                                |                                   | Renal Cortex                                             |                                                   |                                   | Urine                     |                      |                                              |
|------------------|----------------------------------------------------------|------------------------------------------------|-----------------------------------|----------------------------------------------------------|---------------------------------------------------|-----------------------------------|---------------------------|----------------------|----------------------------------------------|
|                  | H <sub>2</sub> O <sub>2</sub> production<br>nmol/mg prot | GPX activity<br>nmol NADPH<br>oxid/min/mg prot | Catalase activity<br>Ucat/mg prot | H <sub>2</sub> O <sub>2</sub> production<br>nmol/mg prot | GPX activity<br>nmol NADPH<br>oxid/min/mg<br>prot | Catalase activity<br>Ucat/mg prot | Isoprostanes<br>ng/24h/kg | TBARS<br>μmol/24h/Kg | H <sub>2</sub> O <sub>2</sub><br>μmol/24h/Kg |
| SHR-STZ          | 0.9 ± 0.1                                                | 95.0 ± 8.3                                     | 47.9 ± 5.4                        | 0.8 ± 0.1                                                | 313.2 ± 30.2                                      | 29.7 ± 1.8                        | 454.7 ± 38.8              | 5.0 ± 0.6            | 12.5 ± 2.0                                   |
| SHR-STZ<br>CADO  | 0.7 ± 0.1                                                | 82.3 ± 9.0                                     | 48.2 ± 5.4                        | 0.4 ± 0.1*                                               | 299.5 ± 29.6                                      | 37.7 ± 4.9                        | 453.8 ± 77.9              | 4.3 ± 0.3            | 8.7 ± 1.5                                    |
| SHR-STZ<br>DPSPX | 0.7 ± 0.1                                                | 82.2 ± 10.3                                    | 34.9 ± 3.8                        | 0.5 ± 0.1*                                               | 304.2 ± 30.1                                      | 33.7 ± 2.8                        | 351.8 ± 58.9              | 4.7 ± 0.1            | 20.8 ± 3.3                                   |

Abbreviations: GPX- glutathione peroxidase; TBARS- thiobarbituric acid reactive substances. Results expressed as mean ± S.E.M.. \*  $p < 0.05$  vs SHR-STZ. Data concerned with SHR-STZ and SHR-STZ+CADO groups has been partially published elsewhere[20].
